# Supplementary material for: Identification of epigenetic methylation-driven signature and risk loci associated with survival for colon cancer
Source: PubMed Central journal article supplement — Ann Transl Med. 2020 Mar;8(6):324. doi: 10.21037/atm.2020.02.94 (PMC7186601; doi:10.21037/atm.2020.02.94), 2020-03
Supplement: atm-08-06-324-supplementary.pdf [file atm-08-06-324-supplementary.pdf]

Table S1. Screening of methylated-driven genes in TCGA cohort.

| gene      | normalMe | TumorMe  | logFC    | pValue   | adjustP  | cor      | corPavlu |
|-----------|----------|----------|----------|----------|----------|----------|----------|
| ADHFE1    | 0.221998 | 0.332621 | 0.583333 | 1.17E-22 | 5.19E-20 | -0.3859  | 3.38E-12 |
| CNNM1     | 0.447799 | 0.598646 | 0.418854 | 1.53E-22 | 6.75E-20 | -0.38478 | 3.94E-12 |
| CCDC8     | 0.375896 | 0.56048  | 0.576327 | 1.98E-22 | 8.77E-20 | -0.39693 | 7.09E-13 |
| FAM43B    | 0.25814  | 0.486077 | 0.913031 | 2.49E-22 | 1.10E-19 | -0.37877 | 8.99E-12 |
| CHST2     | 0.309904 | 0.56755  | 0.872928 | 2.67E-22 | 1.18E-19 | -0.35607 | 1.74E-10 |
| MSC       | 0.226659 | 0.532512 | 1.232289 | 3.91E-22 | 1.73E-19 | -0.47373 | 2.35E-18 |
| GDF6      | 0.276097 | 0.504362 | 0.869282 | 4.81E-22 | 2.13E-19 | -0.34934 | 4.00E-10 |
| MAFB      | 0.125371 | 0.29954  | 1.256544 | 5.06E-22 | 2.24E-19 | -0.35757 | 1.44E-10 |
| ADAMTS5   | 0.35989  | 0.55022  | 0.612453 | 7.15E-22 | 3.16E-19 | -0.39236 | 1.36E-12 |
| ZNF625    | 0.206753 | 0.518038 | 1.325149 | 7.40E-22 | 3.27E-19 | -0.34291 | 8.72E-10 |
| CNRIP1    | 0.32783  | 0.56321  | 0.780723 | 8.35E-22 | 3.69E-19 | -0.53012 | 2.34E-23 |
| DOK5      | 0.130188 | 0.353966 | 1.44302  | 9.41E-22 | 4.16E-19 | -0.37814 | 9.79E-12 |
| RP11-710K | 0.119487 | 0.445787 | 1.899505 | 9.41E-22 | 4.16E-19 | -0.42155 | 1.75E-14 |
| HAND2     | 0.215372 | 0.457822 | 1.087955 | 1.06E-21 | 4.69E-19 | -0.33373 | 2.57E-09 |
| CDO1      | 0.327866 | 0.500208 | 0.60942  | 1.30E-21 | 5.76E-19 | -0.36186 | 8.35E-11 |
| DPY19L2   | 0.125685 | 0.501628 | 1.996804 | 1.63E-21 | 7.19E-19 | -0.36426 | 6.13E-11 |
| RARRES2   | 0.482481 | 0.646931 | 0.423139 | 1.68E-21 | 7.44E-19 | -0.4467  | 2.88E-16 |
| PCDH8     | 0.270007 | 0.525034 | 0.959414 | 1.93E-21 | 8.53E-19 | -0.35418 | 2.20E-10 |
| ZNF568    | 0.103107 | 0.371294 | 1.848415 | 2.25E-21 | 9.94E-19 | -0.59515 | 2.01E-30 |
| SLIT2     | 0.294065 | 0.433092 | 0.558538 | 2.37E-21 | 1.05E-18 | -0.41534 | 4.58E-14 |
| HLX       | 0.277627 | 0.460994 | 0.7316   | 2.67E-21 | 1.18E-18 | -0.31932 | 1.31E-08 |
| BNIP3     | 0.492076 | 0.601364 | 0.289355 | 3.13E-21 | 1.38E-18 | -0.33391 | 2.52E-09 |
| RP11-573K | 0.152148 | 0.423487 | 1.476846 | 3.32E-21 | 1.47E-18 | -0.37299 | 1.95E-11 |
| ZNF135    | 0.541627 | 0.670547 | 0.308039 | 4.00E-21 | 1.77E-18 | -0.54554 | 6.79E-25 |
| KCNA3     | 0.42706  | 0.657803 | 0.623216 | 4.43E-21 | 1.96E-18 | -0.44429 | 4.33E-16 |
| AVPR1A    | 0.236392 | 0.413712 | 0.807445 | 4.90E-21 | 2.17E-18 | -0.34311 | 8.51E-10 |
| NCAM2     | 0.313076 | 0.469776 | 0.585459 | 4.98E-21 | 2.20E-18 | -0.31718 | 1.66E-08 |
| THBD      | 0.18031  | 0.457697 | 1.343912 | 5.15E-21 | 2.28E-18 | -0.33145 | 3.35E-09 |
| EFS       | 0.288031 | 0.524657 | 0.865151 | 5.90E-21 | 2.61E-18 | -0.34813 | 4.64E-10 |
| GLRB      | 0.285371 | 0.558305 | 0.968213 | 6.20E-21 | 2.74E-18 | -0.38326 | 4.87E-12 |
| FBLIM1    | 0.260092 | 0.451209 | 0.794777 | 6.20E-21 | 2.74E-18 | -0.39729 | 6.73E-13 |
| SOX17     | 0.336839 | 0.603063 | 0.840252 | 6.42E-21 | 2.84E-18 | -0.49312 | 5.68E-20 |
| TWIST1    | 0.265016 | 0.510539 | 0.945944 | 6.92E-21 | 3.06E-18 | -0.32418 | 7.63E-09 |
| CLIP4     | 0.346107 | 0.46742  | 0.4335   | 7.10E-21 | 3.14E-18 | -0.38838 | 2.39E-12 |
| CHL1      | 0.434704 | 0.584933 | 0.428239 | 7.72E-21 | 3.41E-18 | -0.34294 | 8.69E-10 |
| ST6GALNA4 | 0.295178 | 0.430696 | 0.545086 | 7.72E-21 | 3.41E-18 | -0.37892 | 8.81E-12 |
| RP11-23P1 | 0.404172 | 0.278842 | -0.53552 | 8.82E-21 | 3.90E-18 | -0.5009  | 1.19E-20 |
| ZNF331    | 0.347894 | 0.487708 | 0.487373 | 9.92E-21 | 4.38E-18 | -0.62027 | 1.32E-33 |
| AQP1      | 0.339924 | 0.491621 | 0.532333 | 1.06E-20 | 4.69E-18 | -0.4309  | 3.95E-15 |
| ZNF134    | 0.231608 | 0.42815  | 0.886429 | 1.64E-20 | 7.23E-18 | -0.78409 | 2.59E-64 |
| LAYN      | 0.24904  | 0.394937 | 0.665245 | 1.75E-20 | 7.73E-18 | -0.37402 | 1.70E-11 |
| PCDH10    | 0.251005 | 0.517711 | 1.044429 | 1.98E-20 | 8.76E-18 | -0.33226 | 3.05E-09 |
| EVC       | 0.209535 | 0.430138 | 1.03761  | 2.06E-20 | 9.13E-18 | -0.34646 | 5.69E-10 |
| AC021218  | 0.620158 | 0.431856 | -0.52209 | 2.08E-20 | 9.20E-18 | -0.46656 | 8.77E-18 |
| SPG20     | 0.287224 | 0.432144 | 0.589334 | 2.56E-20 | 1.13E-17 | -0.46366 | 1.48E-17 |
| ELAVL2    | 0.209754 | 0.402754 | 0.9412   | 2.74E-20 | 1.21E-17 | -0.42322 | 1.35E-14 |
| GALNT13   | 0.24714  | 0.431811 | 0.805072 | 3.23E-20 | 1.43E-17 | -0.37266 | 2.04E-11 |
| LRFN5     | 0.177746 | 0.36292  | 1.029834 | 3.42E-20 | 1.51E-17 | -0.37618 | 1.28E-11 |
| TLL1      | 0.187426 | 0.408665 | 1.124599 | 3.45E-20 | 1.52E-17 | -0.33307 | 2.77E-09 |
| LINC00944 | 0.30227  | 0.183587 | -0.71938 | 4.00E-20 | 1.77E-17 | -0.31816 | 1.49E-08 |
| TGFBI     | 0.393573 | 0.290274 | -0.43922 | 4.60E-20 | 2.03E-17 | -0.47892 | 8.88E-19 |
| SUSD5     | 0.453366 | 0.610986 | 0.430463 | 5.47E-20 | 2.42E-17 | -0.39322 | 1.21E-12 |
| ZNF813    | 0.138578 | 0.278827 | 1.008673 | 5.47E-20 | 2.42E-17 | -0.66277 | 1.06E-39 |
| TM6SF1    | 0.242712 | 0.490184 | 1.014075 | 5.88E-20 | 2.60E-17 | -0.34751 | 5.01E-10 |
| PTF1A     | 0.192925 | 0.456738 | 1.243331 | 6.88E-20 | 3.04E-17 | -0.3491  | 4.12E-10 |
| PROM2     | 0.612312 | 0.714912 | 0.223497 | 8.64E-20 | 3.82E-17 | -0.47804 | 1.05E-18 |

|            |          |          |          |          |          |          |          |
|------------|----------|----------|----------|----------|----------|----------|----------|
| PPP1R16B   | 0.377603 | 0.519763 | 0.460985 | 9.38E-20 | 4.14E-17 | -0.35013 | 3.63E-10 |
| SLPI       | 0.335345 | 0.181753 | -0.88367 | 1.26E-19 | 5.56E-17 | -0.32041 | 1.16E-08 |
| METTL24    | 0.490835 | 0.62573  | 0.350303 | 1.28E-19 | 5.65E-17 | -0.31844 | 1.44E-08 |
| B3GNT7     | 0.338701 | 0.444941 | 0.393601 | 1.53E-19 | 6.75E-17 | -0.41062 | 9.39E-14 |
| FAM46C     | 0.682824 | 0.76842  | 0.170381 | 2.09E-19 | 9.25E-17 | -0.4361  | 1.69E-15 |
| PTGFR      | 0.361081 | 0.498733 | 0.465943 | 2.25E-19 | 9.95E-17 | -0.32637 | 5.97E-09 |
| TRBC2      | 0.217043 | 0.323747 | 0.576885 | 2.56E-19 | 1.13E-16 | -0.34102 | 1.09E-09 |
| ZNF334     | 0.233987 | 0.472523 | 1.013956 | 2.69E-19 | 1.19E-16 | -0.51978 | 2.28E-22 |
| ZNF582     | 0.18882  | 0.458665 | 1.280433 | 3.06E-19 | 1.35E-16 | -0.68009 | 1.76E-42 |
| CAHM       | 0.062635 | 0.276509 | 2.142277 | 3.08E-19 | 1.36E-16 | -0.36549 | 5.23E-11 |
| ZSCAN23    | 0.159829 | 0.375319 | 1.231592 | 3.31E-19 | 1.46E-16 | -0.38959 | 2.01E-12 |
| GBGT1      | 0.363865 | 0.470137 | 0.369676 | 3.48E-19 | 1.54E-16 | -0.57228 | 9.32E-28 |
| ITGA4      | 0.443834 | 0.583626 | 0.395024 | 3.53E-19 | 1.56E-16 | -0.34542 | 6.45E-10 |
| NEFH       | 0.378355 | 0.55982  | 0.56522  | 3.74E-19 | 1.65E-16 | -0.36672 | 4.46E-11 |
| TDRP       | 0.361618 | 0.493078 | 0.447351 | 3.77E-19 | 1.67E-16 | -0.47739 | 1.18E-18 |
| DMRTA1     | 0.111347 | 0.382799 | 1.781522 | 3.89E-19 | 1.72E-16 | -0.38281 | 5.18E-12 |
| ZNF471     | 0.176152 | 0.471076 | 1.419141 | 5.11E-19 | 2.26E-16 | -0.68289 | 6.02E-43 |
| USP54      | 0.528994 | 0.642894 | 0.281329 | 5.80E-19 | 2.57E-16 | -0.41144 | 8.29E-14 |
| ZNF569     | 0.12683  | 0.317277 | 1.322846 | 6.04E-19 | 2.67E-16 | -0.61256 | 1.35E-32 |
| AC009014   | 0.182346 | 0.285704 | 0.647844 | 9.81E-19 | 4.34E-16 | -0.37929 | 8.38E-12 |
| ADCYAP1    | 0.284082 | 0.480519 | 0.758286 | 1.03E-18 | 4.55E-16 | -0.35154 | 3.05E-10 |
| ZNF726     | 0.212901 | 0.521141 | 1.291491 | 1.63E-18 | 7.19E-16 | -0.41286 | 6.69E-14 |
| ZNF793     | 0.198272 | 0.49411  | 1.317352 | 2.19E-18 | 9.69E-16 | -0.65476 | 1.78E-38 |
| CTD-2368   | 0.135295 | 0.282135 | 1.060276 | 2.25E-18 | 9.92E-16 | -0.39208 | 1.42E-12 |
| FOXG1      | 0.230496 | 0.499704 | 1.116329 | 2.75E-18 | 1.22E-15 | -0.39724 | 6.78E-13 |
| C17orf107  | 0.240445 | 0.44121  | 0.875759 | 2.77E-18 | 1.23E-15 | -0.32511 | 6.87E-09 |
| ZNF454     | 0.337864 | 0.510218 | 0.59467  | 2.88E-18 | 1.27E-15 | -0.46143 | 2.21E-17 |
| FUT3       | 0.704784 | 0.80687  | 0.195154 | 3.40E-18 | 1.50E-15 | -0.34438 | 7.31E-10 |
| CSAG1      | 0.688574 | 0.586149 | -0.23234 | 3.88E-18 | 1.72E-15 | -0.32234 | 9.37E-09 |
| FAM218A    | 0.263709 | 0.507657 | 0.944909 | 3.97E-18 | 1.76E-15 | -0.41529 | 4.61E-14 |
| ZNF347     | 0.208075 | 0.376852 | 0.856895 | 4.23E-18 | 1.87E-15 | -0.63199 | 3.43E-35 |
| SLFN13     | 0.31165  | 0.417943 | 0.423381 | 8.04E-18 | 3.56E-15 | -0.50669 | 3.64E-21 |
| SMO        | 0.175819 | 0.304615 | 0.792897 | 8.17E-18 | 3.61E-15 | -0.4715  | 3.55E-18 |
| ZNF43      | 0.047755 | 0.282362 | 2.563815 | 9.83E-18 | 4.34E-15 | -0.7109  | 6.27E-48 |
| AKR1B1     | 0.25278  | 0.514692 | 1.025826 | 1.09E-17 | 4.80E-15 | -0.65193 | 4.73E-38 |
| HOXB13     | 0.14447  | 0.30785  | 1.091455 | 1.21E-17 | 5.35E-15 | -0.45851 | 3.71E-17 |
| RP11-430f  | 0.29197  | 0.472677 | 0.695034 | 1.24E-17 | 5.47E-15 | -0.4256  | 9.24E-15 |
| AZGP1      | 0.635387 | 0.497055 | -0.35423 | 1.57E-17 | 6.94E-15 | -0.43962 | 9.48E-16 |
| ZNF677     | 0.336311 | 0.470221 | 0.483542 | 1.72E-17 | 7.60E-15 | -0.54019 | 2.37E-24 |
| RNF165     | 0.247243 | 0.398532 | 0.688765 | 1.86E-17 | 8.21E-15 | -0.34559 | 6.32E-10 |
| PHOX2B     | 0.30974  | 0.443724 | 0.518606 | 2.25E-17 | 9.93E-15 | -0.32939 | 4.24E-09 |
| AP000251.  | 0.060199 | 0.255873 | 2.087625 | 2.68E-17 | 1.18E-14 | -0.46292 | 1.69E-17 |
| LDOC1      | 0.324993 | 0.564777 | 0.797274 | 2.93E-17 | 1.30E-14 | -0.46236 | 1.87E-17 |
| PABPC5     | 0.571826 | 0.742452 | 0.37672  | 3.39E-17 | 1.50E-14 | -0.50663 | 3.68E-21 |
| CTB-4116.1 | 0.370207 | 0.543724 | 0.554541 | 3.44E-17 | 1.52E-14 | -0.36547 | 5.25E-11 |
| WDR17      | 0.154016 | 0.337228 | 1.13064  | 4.22E-17 | 1.86E-14 | -0.44744 | 2.54E-16 |
| ZNF492     | 0.153483 | 0.31522  | 1.038283 | 5.37E-17 | 2.37E-14 | -0.51559 | 5.60E-22 |
| CMTM3      | 0.135994 | 0.36782  | 1.435458 | 5.96E-17 | 2.63E-14 | -0.42727 | 7.08E-15 |
| ZNF85      | 0.211555 | 0.44884  | 1.085167 | 6.52E-17 | 2.88E-14 | -0.65141 | 5.64E-38 |
| SOX1       | 0.225871 | 0.416334 | 0.882246 | 6.62E-17 | 2.93E-14 | -0.37049 | 2.72E-11 |
| CLIC6      | 0.335453 | 0.436102 | 0.378557 | 7.41E-17 | 3.28E-14 | -0.55564 | 6.04E-26 |
| CTC-444N   | 0.134885 | 0.410448 | 1.60547  | 1.01E-16 | 4.48E-14 | -0.49882 | 1.82E-20 |
| TBX18      | 0.213263 | 0.477267 | 1.16216  | 1.42E-16 | 6.27E-14 | -0.7152  | 9.51E-49 |
| ZNF528     | 0.172157 | 0.40179  | 1.222718 | 1.66E-16 | 7.32E-14 | -0.69495 | 5.06E-45 |
| ZNF730     | 0.111523 | 0.315257 | 1.499188 | 1.67E-16 | 7.38E-14 | -0.36397 | 6.37E-11 |
| FOXD2      | 0.147219 | 0.268386 | 0.866345 | 1.69E-16 | 7.49E-14 | -0.63413 | 1.73E-35 |
| CD34       | 0.49993  | 0.614841 | 0.298486 | 1.77E-16 | 7.83E-14 | -0.40261 | 3.10E-13 |
| AF186192.  | 0.206747 | 0.471299 | 1.188775 | 2.05E-16 | 9.07E-14 | -0.37028 | 2.80E-11 |

|           |          |          |          |          |          |          |          |
|-----------|----------|----------|----------|----------|----------|----------|----------|
| TIGD7     | 0.411146 | 0.566685 | 0.462896 | 2.34E-16 | 1.04E-13 | -0.45778 | 4.22E-17 |
| FAS       | 0.564537 | 0.725335 | 0.361578 | 3.06E-16 | 1.35E-13 | -0.32191 | 9.83E-09 |
| CTD-2666  | 0.297358 | 0.52957  | 0.832621 | 3.81E-16 | 1.68E-13 | -0.58659 | 2.12E-29 |
| GREB1L    | 0.151654 | 0.43815  | 1.530637 | 3.89E-16 | 1.72E-13 | -0.37049 | 2.72E-11 |
| FADS1     | 0.152306 | 0.275349 | 0.854293 | 4.28E-16 | 1.89E-13 | -0.33926 | 1.35E-09 |
| NFE2L3    | 0.227787 | 0.184755 | -0.30207 | 4.37E-16 | 1.93E-13 | -0.4396  | 9.50E-16 |
| ZNF880    | 0.188965 | 0.405601 | 1.101944 | 4.81E-16 | 2.13E-13 | -0.63015 | 6.14E-35 |
| TFAP2C    | 0.160247 | 0.252366 | 0.655216 | 5.57E-16 | 2.46E-13 | -0.38635 | 3.17E-12 |
| CLDN10    | 0.423488 | 0.529105 | 0.321235 | 5.99E-16 | 2.65E-13 | -0.37986 | 7.75E-12 |
| HOXA-AS1  | 0.241935 | 0.460069 | 0.92723  | 5.99E-16 | 2.65E-13 | -0.40876 | 1.24E-13 |
| SOX14     | 0.154354 | 0.304422 | 0.979828 | 6.07E-16 | 2.68E-13 | -0.34709 | 5.27E-10 |
| EPHX3     | 0.217172 | 0.396495 | 0.868463 | 7.89E-16 | 3.49E-13 | -0.32985 | 4.02E-09 |
| TBX20     | 0.289891 | 0.471716 | 0.70241  | 8.12E-16 | 3.59E-13 | -0.37315 | 1.91E-11 |
| CIDEB     | 0.417576 | 0.543117 | 0.379225 | 1.12E-15 | 4.93E-13 | -0.5262  | 5.60E-23 |
| ANO5      | 0.230685 | 0.473902 | 1.038665 | 1.15E-15 | 5.08E-13 | -0.40162 | 3.58E-13 |
| AF186192  | 0.334537 | 0.445153 | 0.412135 | 1.72E-15 | 7.59E-13 | -0.41905 | 2.58E-14 |
| ZNF418    | 0.427587 | 0.57718  | 0.432803 | 3.31E-15 | 1.46E-12 | -0.44041 | 8.31E-16 |
| ZFP82     | 0.239554 | 0.400056 | 0.739848 | 3.40E-15 | 1.50E-12 | -0.75261 | 1.46E-56 |
| RP11-394K | 0.803026 | 0.874225 | 0.122558 | 3.86E-15 | 1.71E-12 | -0.39528 | 8.98E-13 |
| ZNF788    | 0.223232 | 0.466768 | 1.064163 | 3.86E-15 | 1.71E-12 | -0.55081 | 1.94E-25 |
| TMEM88    | 0.674045 | 0.765956 | 0.184416 | 3.89E-15 | 1.72E-12 | -0.49146 | 7.89E-20 |
| ZFPM1     | 0.615434 | 0.65413  | 0.087974 | 5.12E-15 | 2.26E-12 | -0.34854 | 4.41E-10 |
| PPP1R3C   | 0.322554 | 0.510394 | 0.662071 | 5.54E-15 | 2.45E-12 | -0.31838 | 1.45E-08 |
| RHOBTB3   | 0.634922 | 0.786775 | 0.30937  | 1.06E-14 | 4.69E-12 | -0.53065 | 2.08E-23 |
| LINC0046C | 0.754734 | 0.619996 | -0.28371 | 1.23E-14 | 5.43E-12 | -0.36373 | 6.56E-11 |
| RP11-535I | 0.445152 | 0.552361 | 0.311316 | 1.36E-14 | 6.02E-12 | -0.32219 | 9.52E-09 |
| FAM200A   | 0.043568 | 0.148156 | 1.765772 | 1.38E-14 | 6.11E-12 | -0.33917 | 1.36E-09 |
| STK33     | 0.149785 | 0.274602 | 0.874449 | 1.52E-14 | 6.73E-12 | -0.4166  | 3.77E-14 |
| ST8SIA4   | 0.231045 | 0.381574 | 0.723788 | 2.01E-14 | 8.87E-12 | -0.32971 | 4.08E-09 |
| ADAM28    | 0.35338  | 0.222823 | -0.66532 | 2.06E-14 | 9.12E-12 | -0.32012 | 1.20E-08 |
| MAEL      | 0.811977 | 0.734717 | -0.14425 | 2.29E-14 | 1.01E-11 | -0.42928 | 5.13E-15 |
| SULT4A1   | 0.339732 | 0.455274 | 0.42234  | 2.37E-14 | 1.05E-11 | -0.47969 | 7.67E-19 |
| LINC0034C | 0.37942  | 0.261539 | -0.53677 | 2.52E-14 | 1.11E-11 | -0.43758 | 1.33E-15 |
| ZNF790    | 0.138634 | 0.336855 | 1.280841 | 2.73E-14 | 1.21E-11 | -0.4038  | 2.60E-13 |
| KDR       | 0.374177 | 0.506803 | 0.437704 | 2.97E-14 | 1.31E-11 | -0.3248  | 7.12E-09 |
| CD40      | 0.296731 | 0.492169 | 0.729997 | 3.47E-14 | 1.53E-11 | -0.54705 | 4.75E-25 |
| ZNF256    | 0.222779 | 0.35003  | 0.651866 | 3.59E-14 | 1.59E-11 | -0.71805 | 2.68E-49 |
| TCTEX1D1  | 0.344251 | 0.495879 | 0.526528 | 4.26E-14 | 1.88E-11 | -0.31746 | 1.60E-08 |
| SNCA      | 0.19034  | 0.395374 | 1.05464  | 4.56E-14 | 2.02E-11 | -0.37776 | 1.03E-11 |
| ZNF257    | 0.29808  | 0.435594 | 0.547287 | 4.95E-14 | 2.19E-11 | -0.51624 | 4.87E-22 |
| GPX7      | 0.29952  | 0.419237 | 0.485113 | 6.06E-14 | 2.68E-11 | -0.52106 | 1.73E-22 |
| ZNF530    | 0.298953 | 0.440952 | 0.560704 | 6.66E-14 | 2.95E-11 | -0.62835 | 1.08E-34 |
| CTD-2554  | 0.330083 | 0.539804 | 0.709607 | 7.13E-14 | 3.15E-11 | -0.60137 | 3.48E-31 |
| RERG      | 0.241491 | 0.416791 | 0.787358 | 9.46E-14 | 4.18E-11 | -0.32771 | 5.12E-09 |
| HSD17B14  | 0.459694 | 0.584619 | 0.346824 | 9.72E-14 | 4.29E-11 | -0.3801  | 7.50E-12 |
| AQP5      | 0.370918 | 0.564632 | 0.606211 | 1.14E-13 | 5.04E-11 | -0.5259  | 5.98E-23 |
| ZHX1-C8c  | 0.619097 | 0.384883 | -0.68574 | 1.14E-13 | 5.04E-11 | -0.34837 | 4.51E-10 |
| FAM150A   | 0.247387 | 0.403798 | 0.706867 | 1.39E-13 | 6.16E-11 | -0.44334 | 5.09E-16 |
| IL2RG     | 0.350939 | 0.247997 | -0.5009  | 1.66E-13 | 7.33E-11 | -0.44335 | 5.07E-16 |
| VSIG2     | 0.473235 | 0.602511 | 0.348431 | 1.66E-13 | 7.33E-11 | -0.58805 | 1.42E-29 |
| RP11-667I | 0.670465 | 0.764617 | 0.189575 | 1.70E-13 | 7.52E-11 | -0.39782 | 6.23E-13 |
| ZNF354C   | 0.263764 | 0.423376 | 0.682694 | 1.87E-13 | 8.26E-11 | -0.57236 | 9.13E-28 |
| DMRT2     | 0.319717 | 0.432153 | 0.434744 | 1.97E-13 | 8.71E-11 | -0.31745 | 1.61E-08 |
| TMEM35    | 0.482983 | 0.593109 | 0.296325 | 2.81E-13 | 1.24E-10 | -0.34025 | 1.20E-09 |
| LINC0066E | 0.238962 | 0.403527 | 0.755882 | 3.23E-13 | 1.43E-10 | -0.54813 | 3.68E-25 |
| ZSCAN18   | 0.382351 | 0.494587 | 0.371326 | 5.93E-13 | 2.62E-10 | -0.67135 | 4.72E-41 |
| ZNF549    | 0.245209 | 0.376401 | 0.618258 | 7.40E-13 | 3.27E-10 | -0.79299 | 9.58E-67 |
| CERS4     | 0.172408 | 0.23604  | 0.453201 | 8.70E-13 | 3.84E-10 | -0.35309 | 2.52E-10 |

|           |          |          |          |          |          |          |          |
|-----------|----------|----------|----------|----------|----------|----------|----------|
| CLEC14A   | 0.447497 | 0.549519 | 0.29629  | 9.22E-13 | 4.07E-10 | -0.44249 | 5.86E-16 |
| RP11-2C2  | 0.802989 | 0.518004 | -0.63242 | 9.58E-13 | 4.23E-10 | -0.43318 | 2.73E-15 |
| KLF2      | 0.346801 | 0.452676 | 0.384371 | 9.64E-13 | 4.26E-10 | -0.41488 | 4.91E-14 |
| AC016747  | 0.413898 | 0.535014 | 0.370302 | 9.77E-13 | 4.32E-10 | -0.65979 | 3.06E-39 |
| ZNF682    | 0.11835  | 0.235576 | 0.99314  | 1.05E-12 | 4.66E-10 | -0.63789 | 5.14E-36 |
| ANKRD18f  | 0.113158 | 0.342092 | 1.596052 | 1.11E-12 | 4.91E-10 | -0.37485 | 1.52E-11 |
| CTSK      | 0.79508  | 0.841552 | 0.081952 | 1.38E-12 | 6.10E-10 | -0.329   | 4.43E-09 |
| RP11-478k | 0.099123 | 0.212279 | 1.098665 | 2.14E-12 | 9.47E-10 | -0.33543 | 2.11E-09 |
| FGF10     | 0.311724 | 0.420769 | 0.432758 | 2.39E-12 | 1.06E-09 | -0.33796 | 1.57E-09 |
| ZNF461    | 0.05775  | 0.155148 | 1.425751 | 2.42E-12 | 1.07E-09 | -0.43075 | 4.05E-15 |
| ZNF287    | 0.139869 | 0.249926 | 0.837421 | 3.23E-12 | 1.43E-09 | -0.60595 | 9.35E-32 |
| MAATS1    | 0.122752 | 0.261097 | 1.088843 | 3.31E-12 | 1.47E-09 | -0.32785 | 5.05E-09 |
| LINC0153f | 0.386125 | 0.481204 | 0.31758  | 6.47E-12 | 2.86E-09 | -0.41213 | 7.48E-14 |
| ARHGDIb   | 0.534534 | 0.403402 | -0.40607 | 6.67E-12 | 2.95E-09 | -0.51585 | 5.30E-22 |
| SLC43A3   | 0.189329 | 0.336567 | 0.829999 | 6.88E-12 | 3.04E-09 | -0.63655 | 7.93E-36 |
| TMEM87A   | 0.246425 | 0.356679 | 0.533477 | 7.37E-12 | 3.26E-09 | -0.3315  | 3.33E-09 |
| IRX2      | 0.470607 | 0.595762 | 0.340215 | 8.29E-12 | 3.66E-09 | -0.43316 | 2.74E-15 |
| NME5      | 0.099504 | 0.242275 | 1.283816 | 8.71E-12 | 3.85E-09 | -0.4705  | 4.27E-18 |
| PRMT6     | 0.160374 | 0.213171 | 0.410576 | 9.32E-12 | 4.12E-09 | -0.49088 | 8.84E-20 |
| RPL39L    | 0.309177 | 0.435283 | 0.49352  | 1.40E-11 | 6.18E-09 | -0.63921 | 3.34E-36 |
| NUDT16P1  | 0.176265 | 0.141818 | -0.31371 | 1.54E-11 | 6.81E-09 | -0.3632  | 7.03E-11 |
| AC005498  | 0.096191 | 0.349144 | 1.859851 | 1.85E-11 | 8.18E-09 | -0.54709 | 4.70E-25 |
| ZNF350    | 0.175082 | 0.2853   | 0.704451 | 3.02E-11 | 1.33E-08 | -0.61013 | 2.76E-32 |
| MAGEH1    | 0.310126 | 0.565607 | 0.866945 | 3.53E-11 | 1.56E-08 | -0.51287 | 9.98E-22 |
| PIGR      | 0.4728   | 0.629769 | 0.413591 | 3.86E-11 | 1.71E-08 | -0.69934 | 8.40E-46 |
| AREG      | 0.443639 | 0.331445 | -0.42061 | 4.76E-11 | 2.10E-08 | -0.46542 | 1.08E-17 |
| RP11-474i | 0.550863 | 0.686679 | 0.317943 | 5.23E-11 | 2.31E-08 | -0.46528 | 1.10E-17 |
| KIAA0226l | 0.203317 | 0.22916  | 0.172621 | 5.39E-11 | 2.38E-08 | -0.3387  | 1.44E-09 |
| CTD-2535  | 0.502783 | 0.425098 | -0.24214 | 5.49E-11 | 2.43E-08 | -0.37703 | 1.14E-11 |
| ZSCAN12   | 0.322617 | 0.418915 | 0.376837 | 7.78E-11 | 3.44E-08 | -0.36465 | 5.83E-11 |
| PKIA      | 0.265609 | 0.365334 | 0.459911 | 9.67E-11 | 4.27E-08 | -0.47203 | 3.22E-18 |
| FIRRE     | 0.554392 | 0.364968 | -0.60314 | 9.67E-11 | 4.27E-08 | -0.4339  | 2.43E-15 |
| ARMCX1    | 0.46465  | 0.571009 | 0.297369 | 1.41E-10 | 6.25E-08 | -0.39478 | 9.65E-13 |
| FAM72B    | 0.064152 | 0.298554 | 2.218427 | 1.45E-10 | 6.39E-08 | -0.62237 | 6.95E-34 |
| FZD7      | 0.275668 | 0.323372 | 0.230263 | 1.45E-10 | 6.43E-08 | -0.35395 | 2.27E-10 |
| KLHL34    | 0.426087 | 0.586477 | 0.460925 | 1.60E-10 | 7.06E-08 | -0.45482 | 7.09E-17 |
| ARSJ      | 0.204973 | 0.179922 | -0.18806 | 1.61E-10 | 7.10E-08 | -0.44508 | 3.79E-16 |
| FZD10     | 0.271201 | 0.416881 | 0.620274 | 2.22E-10 | 9.81E-08 | -0.45896 | 3.43E-17 |
| AMT       | 0.45051  | 0.554648 | 0.300011 | 2.39E-10 | 1.06E-07 | -0.68264 | 6.63E-43 |
| SLFN11    | 0.168409 | 0.309982 | 0.880212 | 2.48E-10 | 1.09E-07 | -0.40106 | 3.89E-13 |
| PVRL1     | 0.567631 | 0.595627 | 0.069454 | 2.67E-10 | 1.18E-07 | -0.33699 | 1.76E-09 |
| SLFN12    | 0.316695 | 0.408    | 0.365476 | 3.73E-10 | 1.65E-07 | -0.5596  | 2.28E-26 |
| NRSN2     | 0.150817 | 0.217423 | 0.527704 | 3.80E-10 | 1.68E-07 | -0.52803 | 3.73E-23 |
| FBXO17    | 0.106539 | 0.188692 | 0.824645 | 5.71E-10 | 2.52E-07 | -0.3523  | 2.78E-10 |
| RP11-114k | 0.653316 | 0.737494 | 0.174851 | 8.31E-10 | 3.67E-07 | -0.3761  | 1.29E-11 |
| LTB       | 0.259994 | 0.317277 | 0.287265 | 8.73E-10 | 3.86E-07 | -0.37705 | 1.13E-11 |
| LEFTY1    | 0.309897 | 0.381898 | 0.301395 | 9.60E-10 | 4.24E-07 | -0.56171 | 1.35E-26 |
| ZNF529    | 0.140128 | 0.257946 | 0.880323 | 1.17E-09 | 5.18E-07 | -0.63238 | 3.03E-35 |
| SERP2     | 0.484276 | 0.602843 | 0.315954 | 1.20E-09 | 5.30E-07 | -0.6647  | 5.34E-40 |
| ZNF329    | 0.304473 | 0.378925 | 0.315598 | 1.38E-09 | 6.11E-07 | -0.55957 | 2.30E-26 |
| AOX1      | 0.370022 | 0.50577  | 0.45087  | 2.05E-09 | 9.07E-07 | -0.4018  | 3.49E-13 |
| SLC1A1    | 0.153524 | 0.181619 | 0.242455 | 2.92E-09 | 1.29E-06 | -0.31972 | 1.25E-08 |
| HYDIN     | 0.418229 | 0.494783 | 0.242504 | 2.97E-09 | 1.31E-06 | -0.40133 | 3.74E-13 |
| LINC0086f | 0.251356 | 0.320064 | 0.348631 | 4.14E-09 | 1.83E-06 | -0.51137 | 1.37E-21 |
| RP11-267j | 0.307562 | 0.240876 | -0.35259 | 4.78E-09 | 2.11E-06 | -0.41007 | 1.02E-13 |
| GOLGA8A   | 0.377245 | 0.457068 | 0.276906 | 4.91E-09 | 2.17E-06 | -0.32727 | 5.39E-09 |
| DAPP1     | 0.548386 | 0.435448 | -0.33269 | 5.23E-09 | 2.31E-06 | -0.71714 | 4.02E-49 |
| NXPE4     | 0.474002 | 0.590931 | 0.318097 | 5.23E-09 | 2.31E-06 | -0.49329 | 5.49E-20 |

|           |          |          |          |          |          |          |          |
|-----------|----------|----------|----------|----------|----------|----------|----------|
| LINC0155E | 0.360366 | 0.302704 | -0.25156 | 5.95E-09 | 2.63E-06 | -0.5154  | 5.84E-22 |
| B3GALNT1  | 0.255276 | 0.392106 | 0.619189 | 7.70E-09 | 3.40E-06 | -0.40874 | 1.25E-13 |
| ZNF264    | 0.271551 | 0.346976 | 0.353612 | 8.03E-09 | 3.55E-06 | -0.60743 | 6.08E-32 |
| DTX3      | 0.248797 | 0.411108 | 0.724548 | 9.06E-09 | 4.01E-06 | -0.44949 | 1.79E-16 |
| CIART     | 0.283296 | 0.429774 | 0.601266 | 1.04E-08 | 4.61E-06 | -0.33133 | 3.39E-09 |
| TMEM220   | 0.365562 | 0.466955 | 0.353166 | 1.21E-08 | 5.34E-06 | -0.52505 | 7.21E-23 |
| CTD-3035  | 0.717326 | 0.750969 | 0.066125 | 1.27E-08 | 5.62E-06 | -0.37357 | 1.81E-11 |
| PRSS41    | 0.693249 | 0.730639 | 0.075785 | 1.28E-08 | 5.65E-06 | -0.43952 | 9.64E-16 |
| ZNF550    | 0.250215 | 0.33338  | 0.414001 | 1.40E-08 | 6.17E-06 | -0.61764 | 2.94E-33 |
| ZNF300    | 0.433435 | 0.546822 | 0.335254 | 1.42E-08 | 6.27E-06 | -0.70686 | 3.57E-47 |
| CTD-2245  | 0.049179 | 0.21313  | 2.115619 | 1.43E-08 | 6.33E-06 | -0.49838 | 1.98E-20 |
| REP15     | 0.323084 | 0.461574 | 0.514655 | 1.74E-08 | 7.70E-06 | -0.3726  | 2.06E-11 |
| RP11-543I | 0.784165 | 0.66364  | -0.24075 | 1.97E-08 | 8.71E-06 | -0.42296 | 1.40E-14 |
| ZNF844    | 0.107525 | 0.178776 | 0.733478 | 2.34E-08 | 1.04E-05 | -0.6801  | 1.76E-42 |
| ZNF718    | 0.258114 | 0.363455 | 0.493765 | 2.84E-08 | 1.26E-05 | -0.59162 | 5.37E-30 |
| CTC-260E  | 0.149526 | 0.257737 | 0.785506 | 2.90E-08 | 1.28E-05 | -0.38414 | 4.31E-12 |
| CYP2B7P   | 0.568652 | 0.664136 | 0.223934 | 3.33E-08 | 1.47E-05 | -0.47741 | 1.18E-18 |
| ZNF254    | 0.21347  | 0.354567 | 0.732026 | 3.64E-08 | 1.61E-05 | -0.3419  | 9.83E-10 |
| KRT20     | 0.624865 | 0.492488 | -0.34346 | 4.19E-08 | 1.85E-05 | -0.3365  | 1.86E-09 |
| ZNF83     | 0.186263 | 0.252532 | 0.439128 | 4.32E-08 | 1.91E-05 | -0.50184 | 9.86E-21 |
| BX842568  | 0.430227 | 0.496517 | 0.206746 | 5.71E-08 | 2.52E-05 | -0.31988 | 1.23E-08 |
| GSTP1     | 0.143655 | 0.137173 | -0.06661 | 6.18E-08 | 2.73E-05 | -0.33496 | 2.23E-09 |
| ITPRIPL1  | 0.233956 | 0.310367 | 0.407736 | 6.43E-08 | 2.84E-05 | -0.357   | 1.55E-10 |
| FUZ       | 0.118831 | 0.187386 | 0.657095 | 6.76E-08 | 2.99E-05 | -0.58647 | 2.19E-29 |
| ZNF345    | 0.124634 | 0.214207 | 0.781312 | 9.12E-08 | 4.03E-05 | -0.5466  | 5.29E-25 |
| SLC14A1   | 0.826671 | 0.851918 | 0.043402 | 9.96E-08 | 4.40E-05 | -0.36526 | 5.39E-11 |
| VWDE      | 0.210311 | 0.291184 | 0.46941  | 1.53E-07 | 6.77E-05 | -0.44093 | 7.61E-16 |
| RP11-47P  | 0.387173 | 0.33122  | -0.22519 | 2.26E-07 | 9.97E-05 | -0.5262  | 5.59E-23 |
| RP11-680f | 0.402565 | 0.458309 | 0.187099 | 2.31E-07 | 0.000102 | -0.59552 | 1.82E-30 |
| BEX4      | 0.24189  | 0.384933 | 0.670259 | 2.45E-07 | 0.000108 | -0.43552 | 1.86E-15 |
| RP1-122P  | 0.193185 | 0.267989 | 0.472192 | 2.54E-07 | 0.000112 | -0.32474 | 7.16E-09 |
| SHC3      | 0.324159 | 0.417055 | 0.363539 | 3.56E-07 | 0.000157 | -0.43134 | 3.68E-15 |
| TRIM29    | 0.584094 | 0.529919 | -0.14043 | 3.70E-07 | 0.000163 | -0.67544 | 1.03E-41 |
| LINC0060E | 0.237051 | 0.333227 | 0.491307 | 4.60E-07 | 0.000203 | -0.38012 | 7.49E-12 |
| LRRC34    | 0.043022 | 0.103102 | 1.260931 | 5.21E-07 | 0.00023  | -0.33784 | 1.59E-09 |
| RP11-255f | 0.228458 | 0.320927 | 0.490312 | 5.56E-07 | 0.000246 | -0.41322 | 6.33E-14 |
| SATB2     | 0.210924 | 0.278632 | 0.401642 | 6.01E-07 | 0.000266 | -0.48833 | 1.46E-19 |
| C5orf52   | 0.227572 | 0.276727 | 0.282135 | 6.29E-07 | 0.000278 | -0.37336 | 1.86E-11 |
| LINC01214 | 0.649108 | 0.738205 | 0.185563 | 7.09E-07 | 0.000313 | -0.37467 | 1.56E-11 |
| SMOC1     | 0.30672  | 0.368664 | 0.265386 | 7.25E-07 | 0.00032  | -0.33092 | 3.56E-09 |
| GSTM1     | 0.280782 | 0.385913 | 0.458825 | 7.32E-07 | 0.000323 | -0.59477 | 2.24E-30 |
| SYCP2     | 0.688854 | 0.708461 | 0.040491 | 8.16E-07 | 0.000361 | -0.35479 | 2.04E-10 |
| FAM179B   | 0.071307 | 0.140997 | 0.983553 | 1.04E-06 | 0.00046  | -0.46556 | 1.05E-17 |
| HOXB-AS   | 0.509513 | 0.568255 | 0.157418 | 1.05E-06 | 0.000462 | -0.47833 | 9.91E-19 |
| HSPA1A    | 0.096938 | 0.278949 | 1.524871 | 1.19E-06 | 0.000526 | -0.47704 | 1.26E-18 |
| CLDN18    | 0.734102 | 0.696917 | -0.075   | 1.20E-06 | 0.000529 | -0.33091 | 3.56E-09 |
| RP11-370I | 0.286371 | 0.437971 | 0.61295  | 1.20E-06 | 0.000529 | -0.49964 | 1.54E-20 |
| AC022182  | 0.385273 | 0.298869 | -0.36637 | 1.47E-06 | 0.000649 | -0.40424 | 2.44E-13 |
| HOXB2     | 0.596    | 0.651856 | 0.12924  | 1.47E-06 | 0.000652 | -0.70417 | 1.12E-46 |
| PON3      | 0.237064 | 0.218981 | -0.11447 | 1.55E-06 | 0.000684 | -0.32281 | 8.89E-09 |
| TMEM106   | 0.182511 | 0.376702 | 1.045436 | 1.59E-06 | 0.000703 | -0.5901  | 8.16E-30 |
| FAM127A   | 0.234675 | 0.391034 | 0.736629 | 1.76E-06 | 0.000778 | -0.53635 | 5.73E-24 |
| PSMA8     | 0.65324  | 0.681866 | 0.061875 | 2.25E-06 | 0.000994 | -0.38118 | 6.48E-12 |
| ZNF583    | 0.06738  | 0.116611 | 0.791305 | 2.36E-06 | 0.001043 | -0.46223 | 1.91E-17 |
| AHR       | 0.737309 | 0.777873 | 0.077265 | 2.53E-06 | 0.001119 | -0.42989 | 4.65E-15 |
| LYZ       | 0.653832 | 0.546817 | -0.25786 | 2.54E-06 | 0.001123 | -0.5274  | 4.30E-23 |
| BHLHB9    | 0.377451 | 0.469526 | 0.314918 | 3.96E-06 | 0.00175  | -0.33149 | 3.33E-09 |
| ZNF879    | 0.199052 | 0.301566 | 0.599326 | 4.38E-06 | 0.001938 | -0.68408 | 3.80E-43 |

|           |          |          |          |          |          |          |          |
|-----------|----------|----------|----------|----------|----------|----------|----------|
| GIPC2     | 0.12986  | 0.120185 | -0.11169 | 4.44E-06 | 0.001963 | -0.38688 | 2.95E-12 |
| RP1-97D1  | 0.339351 | 0.417567 | 0.299229 | 4.59E-06 | 0.002031 | -0.45    | 1.64E-16 |
| GNG4      | 0.296919 | 0.286776 | -0.05015 | 4.92E-06 | 0.002173 | -0.51318 | 9.35E-22 |
| RP11-616f | 0.189369 | 0.262415 | 0.470653 | 4.92E-06 | 0.002173 | -0.33954 | 1.30E-09 |
| BST2      | 0.540382 | 0.431224 | -0.32554 | 5.46E-06 | 0.002414 | -0.68763 | 9.46E-44 |
| NINL      | 0.274784 | 0.35925  | 0.38669  | 5.82E-06 | 0.002571 | -0.37392 | 1.73E-11 |
| PHLDA3    | 0.31218  | 0.360883 | 0.209154 | 6.46E-06 | 0.002855 | -0.48941 | 1.18E-19 |
| LY6G6E    | 0.659046 | 0.516763 | -0.35088 | 6.62E-06 | 0.002928 | -0.56181 | 1.32E-26 |
| CROT      | 0.104345 | 0.120418 | 0.206685 | 7.35E-06 | 0.003248 | -0.3459  | 6.09E-10 |
| RAB32     | 0.162034 | 0.161769 | -0.00236 | 7.69E-06 | 0.0034   | -0.34344 | 8.19E-10 |
| LINC01415 | 0.546839 | 0.569443 | 0.058434 | 7.76E-06 | 0.003429 | -0.51549 | 5.72E-22 |
| ZNF518B   | 0.382427 | 0.462855 | 0.275378 | 9.61E-06 | 0.004249 | -0.77939 | 4.49E-63 |
| ZNF614    | 0.039555 | 0.116555 | 1.559087 | 1.42E-05 | 0.006278 | -0.37315 | 1.91E-11 |
| RP4-584D  | 0.37469  | 0.445988 | 0.251307 | 1.43E-05 | 0.006329 | -0.39425 | 1.04E-12 |
| MPC2      | 0.839097 | 0.862606 | 0.039864 | 1.44E-05 | 0.006355 | -0.3286  | 4.63E-09 |
| MAP10     | 0.332509 | 0.407087 | 0.291943 | 1.90E-05 | 0.008377 | -0.67218 | 3.47E-41 |
| SLC2A10   | 0.061704 | 0.119718 | 0.956212 | 1.93E-05 | 0.008511 | -0.43655 | 1.57E-15 |
| NT5DC4    | 0.881028 | 0.81274  | -0.11639 | 1.93E-05 | 0.008545 | -0.61701 | 3.55E-33 |
| LPL       | 0.359378 | 0.420568 | 0.226836 | 2.18E-05 | 0.009624 | -0.32476 | 7.15E-09 |
| RP11-496f | 0.837892 | 0.854744 | 0.028728 | 2.87E-05 | 0.012666 | -0.33285 | 2.85E-09 |
| LY6G6D    | 0.489977 | 0.402763 | -0.28278 | 2.88E-05 | 0.012716 | -0.58326 | 5.20E-29 |
| CTD-3060  | 0.93247  | 0.873479 | -0.09428 | 2.99E-05 | 0.01322  | -0.32784 | 5.05E-09 |
| RGN       | 0.599679 | 0.666636 | 0.152707 | 3.73E-05 | 0.016483 | -0.5159  | 5.24E-22 |
| QPCT      | 0.336294 | 0.33595  | -0.00147 | 4.04E-05 | 0.017867 | -0.3623  | 7.89E-11 |
| AK4       | 0.234333 | 0.252465 | 0.107518 | 5.52E-05 | 0.024402 | -0.35371 | 2.33E-10 |
| ZNF543    | 0.118565 | 0.307191 | 1.373459 | 7.18E-05 | 0.031715 | -0.73019 | 1.01E-51 |
| FAM221A   | 0.367038 | 0.404408 | 0.139881 | 8.70E-05 | 0.038441 | -0.41197 | 7.65E-14 |
| TUSC1     | 0.110467 | 0.105828 | -0.0619  | 8.83E-05 | 0.039011 | -0.39627 | 7.80E-13 |
| EVI2A     | 0.7948   | 0.822485 | 0.049398 | 8.86E-05 | 0.039155 | -0.41657 | 3.79E-14 |
| TRPV2     | 0.660228 | 0.694054 | 0.072084 | 9.64E-05 | 0.042601 | -0.34206 | 9.65E-10 |
| NAPRT     | 0.292625 | 0.277005 | -0.07914 | 0.000102 | 0.045165 | -0.36082 | 9.53E-11 |
| ZNF721    | 0.572462 | 0.526927 | -0.11958 | 0.000113 | 0.049824 | -0.33678 | 1.80E-09 |
